# Supplementary material for: Effects of biological sex mismatch on neural progenitor cell transplantation for spinal cord injury in mice
Source: PubMed Central journal article supplement (PMC9474813; doi:10.1038/s41467-022-33134-x), 2022-09-14
Supplement: 41467_2022_33134_MOESM1_ESM.pdf [file 41467_2022_33134_MOESM1_ESM.pdf]

## Supplementary Information

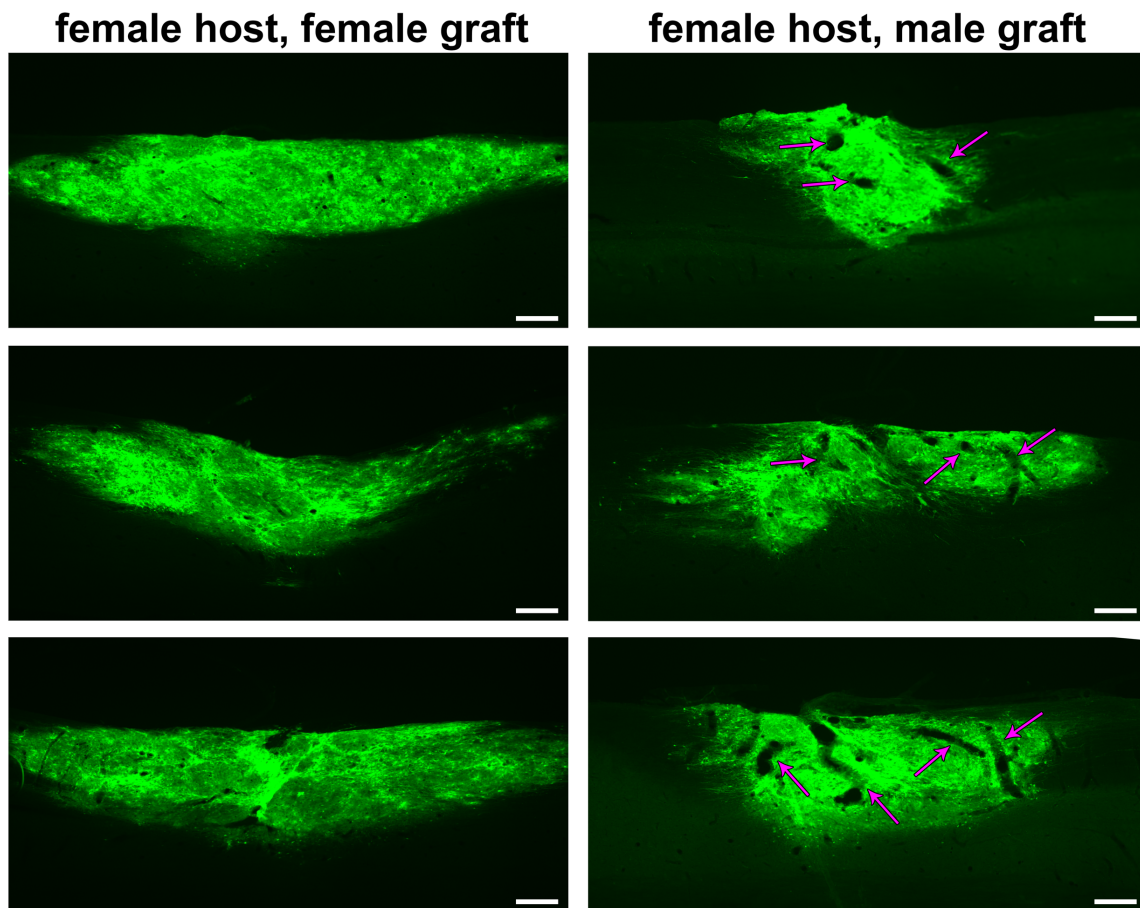

### Supplementary Figure 1. Gross appearance of grafts at 4 weeks post-transplantation.

The gross appearance of GFP<sup>+</sup> grafts is shown for six individual animals. The left column shows three different subjects from the female host/female graft group, exhibiting typical graft morphology similar to that observed in previous NPC transplantation studies. The right column shows three different subjects from the female host/male graft group; grafts exhibit atypical morphology with large GFP-negative regions resembling vascular structures (arrows). Scale bar = 250  $\mu$ m. These experiments were performed twice with similar results.

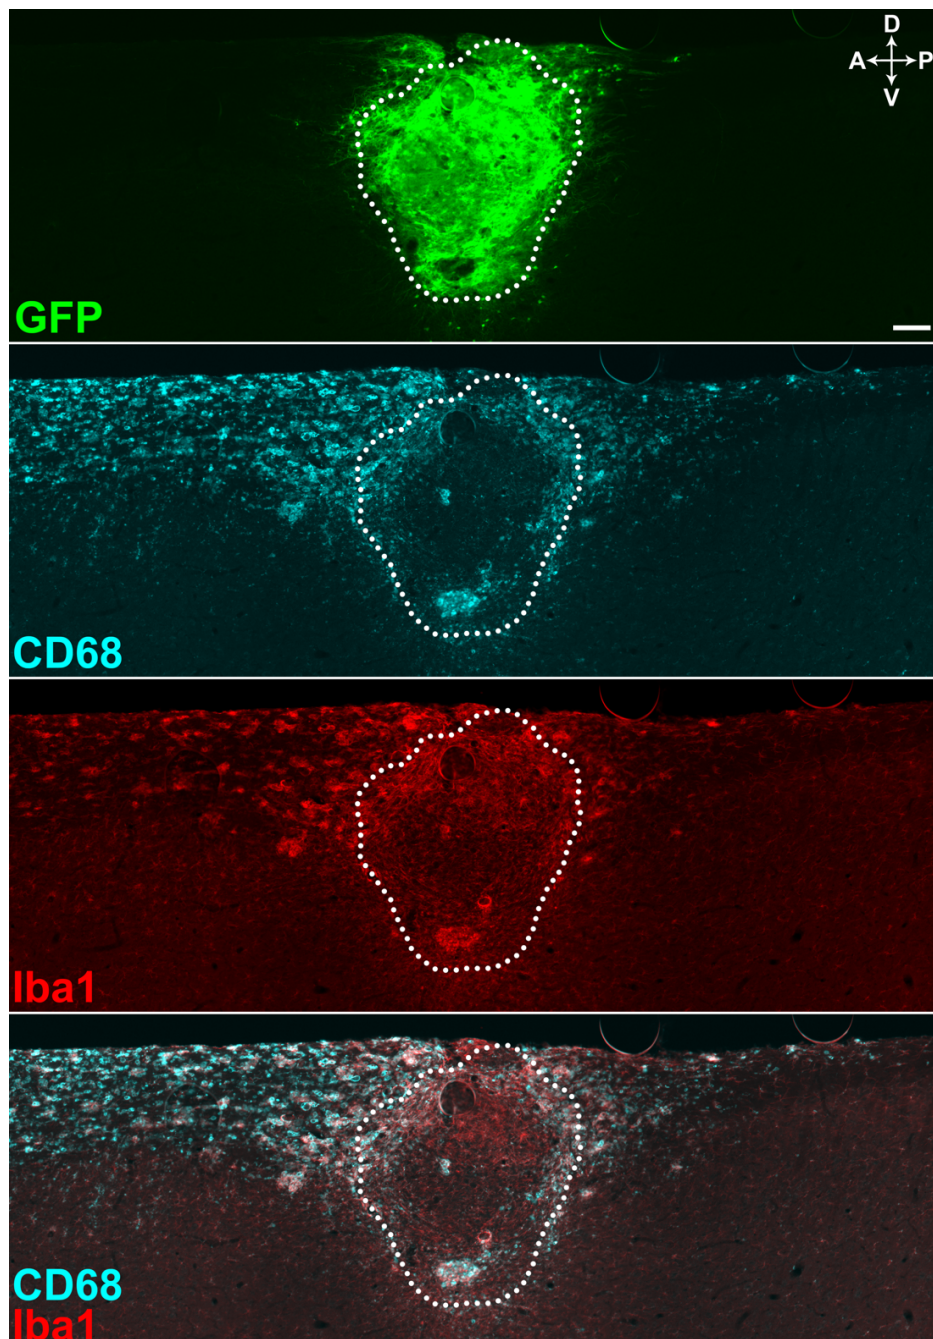

**Supplementary Figure 2. Macrophage/microglial immunoreactivity in a neural progenitor cell graft.** This image is of a female NPC graft in a female host at 4 weeks post-transplantation. Dotted lines depict the GFP<sup>+</sup> graft border. CD68 and Iba1 are phagocytic cell markers that label cells within the graft and outside the graft, particularly in the degenerating white matter tracts anterior to the lesion/graft. Scale bar = 100  $\mu$ m. These experiments were performed twice with similar results.

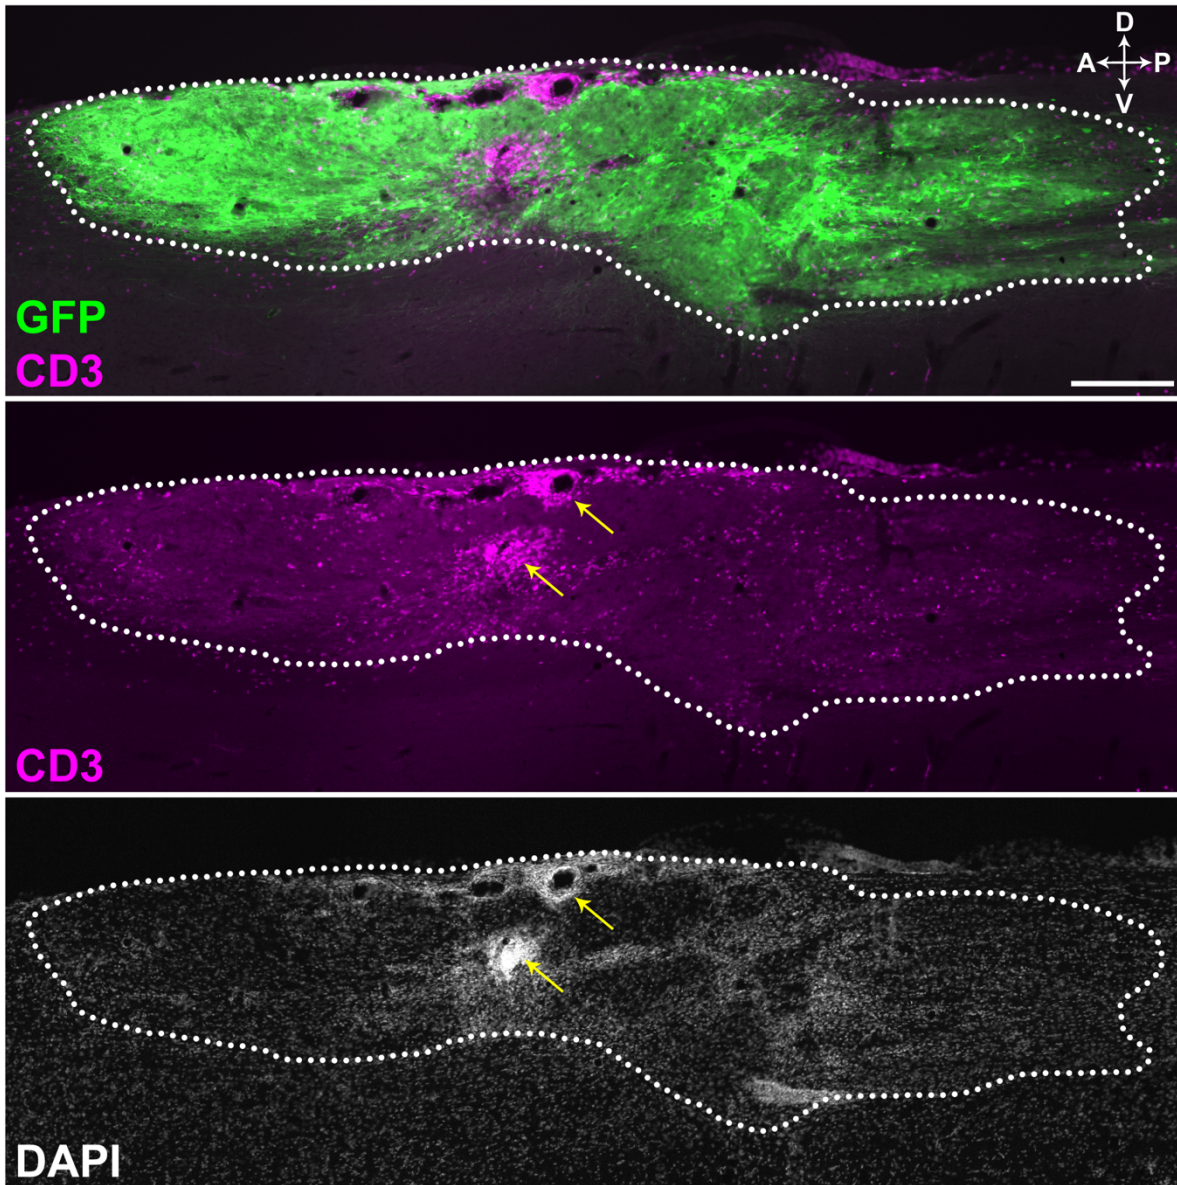

**Supplementary Figure 3. T lymphocyte distribution in a neural progenitor cell graft.**

This image is of a male NPC graft in a female host at 4 weeks post-transplantation. Dotted lines depict the GFP<sup>+</sup> graft border. CD3 antigen is a common marker of T lymphocytes; here T cells are seen throughout the graft and concentrated in some perivascular regions (arrows). Scale bar = 250  $\mu$ m. These experiments were performed twice with similar results.

### Normalized GFP intensity

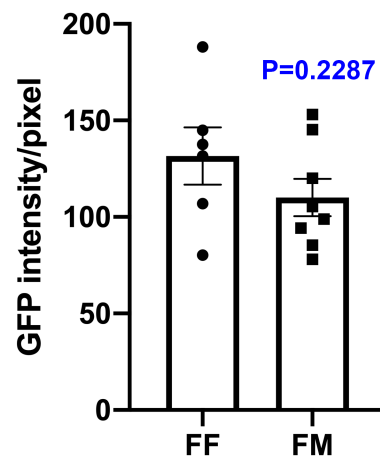

**Supplementary Figure 4. Quantification of GFP immunoreactivity in male and female neural progenitor cell grafts.** The total intensity of GFP immunoreactivity for male and female grafts within female hosts were quantified. GFP intensity is normalized to graft area. FF (n=6 mice); FM (n=8 mice). All data are mean  $\pm$  SEM. Significance was determined by an unpaired, two-tailed t test.

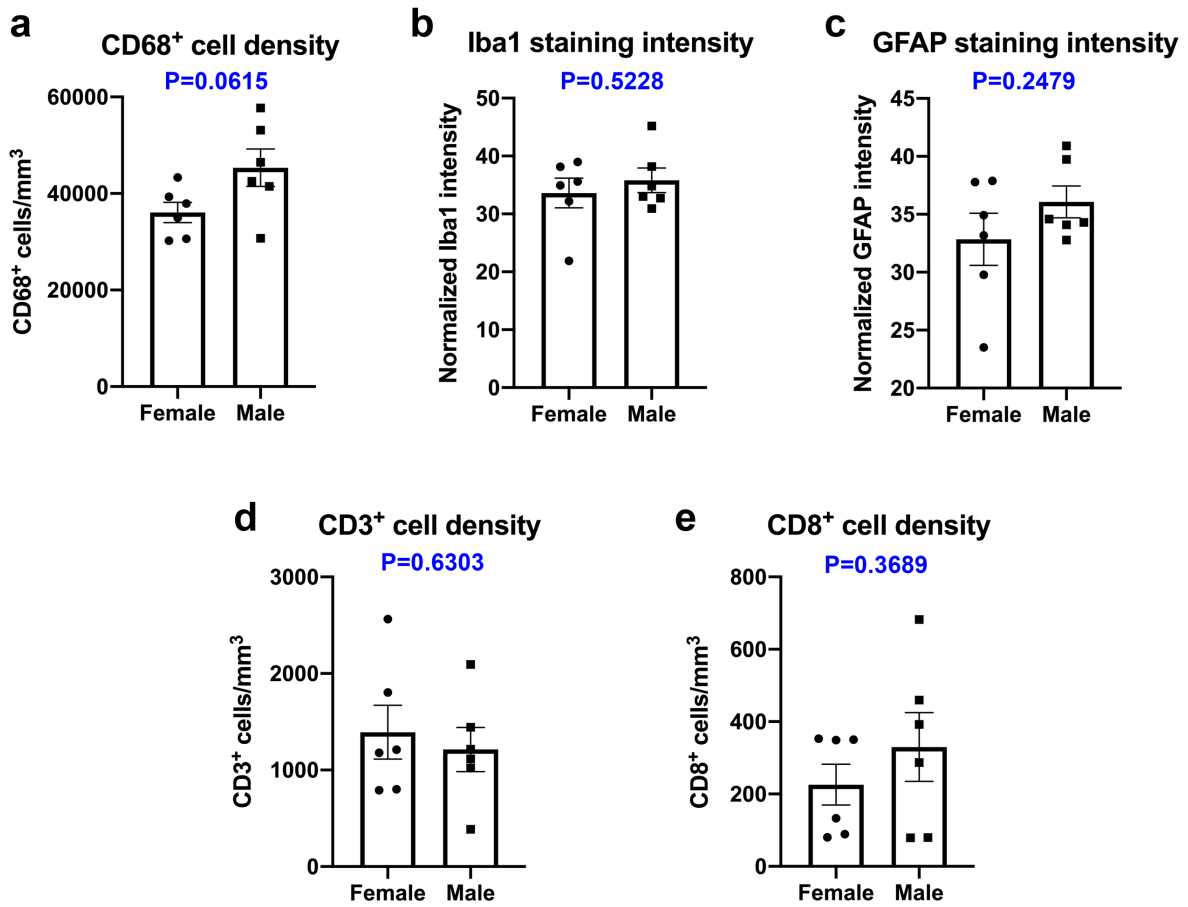

**Supplementary Figure 5. Quantification of phagocytic, astroglial, and immune cell markers after spinal cord injury in male and female mice.** Data are from male (n=6 mice) and female (n=6 mice) mice at 4 weeks after cervical dorsal column SCI; the lesion site and a 500- $\mu$ m perilesional area were quantified. Quantifications are of (a) the density of CD68<sup>+</sup> cells, (b) Iba1 immunoreactivity, (c) GFAP immunoreactivity, (d) CD3<sup>+</sup> cell density, and (e) CD8<sup>+</sup> cell density in and around the lesion site. All data are mean  $\pm$  SEM. Significance was determined by unpaired, two-tailed t test.

**Supplementary Table 1. Detailed description of statistical analyses used in this study.**

| <b>Figure</b> | <b>Parameter</b>     | <b>Group size (N)</b>                                                 | <b>Statistical test</b>                                                | <b>Significance level</b>                                                                                                                                                                                                                                                                                                                                                                                                                                  |
|---------------|----------------------|-----------------------------------------------------------------------|------------------------------------------------------------------------|------------------------------------------------------------------------------------------------------------------------------------------------------------------------------------------------------------------------------------------------------------------------------------------------------------------------------------------------------------------------------------------------------------------------------------------------------------|
| 2b            | Graft neuron density | GM (n=5); MM (n=9); MX (n=6); MF (n=9); FF (n=7); FX (n=5); FM (n=10) | Ordinary one-way ANOVA with Dunnett's multiple comparisons test        | F (6, 44) = 1.901, P=0.1021                                                                                                                                                                                                                                                                                                                                                                                                                                |
| 2d            | GFAP in graft        | MM (n=9); MX (n=8); MF (n=8); FF (n=8); FX (n=6); FM (n=10)           | Two-way ANOVA with Sidak's multiple comparisons test                   | Interaction: F (2, 43) = 0.1007, P=0.9044<br>Graft type: F (2, 43) = 1.226, P=0.3035<br>Host sex: F (1, 43) = 0.7088, P=0.4045<br><br>No significant differences between groups                                                                                                                                                                                                                                                                            |
| 2e            | GFAP around graft    | MM (n=9); MX (n=8); MF (n=8); FF (n=8); FX (n=6); FM (n=10)           | Two-way ANOVA with Sidak's multiple comparisons test                   | Interaction: F (2, 43) = 0.4227, P=0.6580<br>Graft type: F (2, 43) = 0.6165, P=0.5446<br>Host sex: F (1, 43) = 1.484, P=0.2298<br><br>No significant differences between groups                                                                                                                                                                                                                                                                            |
| 2f            | Axon outgrowth       | MM (n=9); MX (n=5); MF (n=9); FF (n=8); FX (n=6); FM (n=10)           | Two-way repeated measures ANOVA with Tukey's multiple comparisons test | Distance x Group main effect: F (95, 779) = 1.981, P<0.0001<br>Distance main effect: F (2.119, 86.89) = 151.7, P<0.0001<br>Group main effect: F (5, 41) = 2.606, P=0.0389<br>Subject main effect: F (41, 779) = 1.93, P<0.0001<br><br>-3500, MM vs. FM: P=0.0271;<br>-3000, MM vs. MX: P=0.0101;<br>-3000, MM vs. FM: P=0.0185;<br>-2500, MM vs. MX: P=0.0329;<br>-2500, MM vs. FM: P=0.0255;<br>-2000, MX vs. MF: P=0.0314;<br>-2000, MX vs. FF: P=0.0363 |

|    |                                      |                                                              |                                                      |                                                                                                                                                                                                                                                         |
|----|--------------------------------------|--------------------------------------------------------------|------------------------------------------------------|---------------------------------------------------------------------------------------------------------------------------------------------------------------------------------------------------------------------------------------------------------|
| 3c | Vascular footprint                   | MM (n=9); MX (n=4); MF (n=9); FF (n=5); FX (n=8); FM (n=7)   | Two-way ANOVA with Sidak's multiple comparisons test | Interaction: F (2, 36) = 13.45, P<0.0001<br>Graft type: F (2, 36) = 12.52, P<0.0001<br>Host sex: F (1, 36) = 5.472, P=0.0250<br><br>MM vs. FM: P<0.0001;<br>MX vs. FM: P=0.0008;<br>MF vs. FM: P<0.0001;<br>FF vs. FM: P<0.0001;<br>FX vs. FM: P<0.0001 |
| 3d | Vascular diameter                    | MM (n=6); MX (n=4); MF (n=7); FF (n=5); FX (n=8); FM (n=7)   | Two-way ANOVA with Sidak's multiple comparisons test | Interaction: F (2, 31) = 4.036, P=0.0277<br>Graft type: F (2, 31) = 9.431, P=0.0006<br>Host sex: F (1, 31) = 1.342, P=0.2554<br><br>MX vs. FM: P=0.0030;<br>FF vs. FM: P=0.0228;<br>FX vs. FM: P=0.0003                                                 |
| 3g | Perivascular cell density            | MM (n=9); MX (n=4); MF (n=9); FF (n=5); FX (n=6); FM (n=9)   | Two-way ANOVA with Sidak's multiple comparisons test | Interaction: F (2, 36) = 4.089, P=0.0251<br>Graft type: F (2, 36) = 7.164, P=0.0024<br>Host sex: F (1, 36) = 3.799, P=0.0591<br><br>MM vs. FM: P=0.0058;<br>MX vs. FM: P=0.0094;<br>MF vs. FM: P=0.0022;<br>FF vs. FM: P=0.0326;<br>FX vs. FM: P=0.0011 |
| 4b | Graft CD68 <sup>+</sup> cell density | MM (n=9); MX (n=7); MF (n=10); FF (n=6); FX (n=6); FM (n=10) | Two-way ANOVA with Sidak's multiple comparisons test | Interaction: F (2, 42) = 0.1519, P=0.8596<br>Graft type: F (2, 42) = 1.601, P=0.2138<br>Host sex: F (1, 42) = 0.1302, P=0.7200<br><br>No significant differences between groups                                                                         |
| 4c | Graft Iba1 staining intensity        | MM (n=8); MX (n=7); MF (n=10); FF (n=6); FX (n=6); FM (n=9)  | Two-way ANOVA with Sidak's multiple comparisons test | Interaction: F (2, 40) = 1.054, P=0.3579<br>Graft type: F (2, 40) = 4.136, P=0.0233<br>Host sex: F (1, 40) = 2.354, P=0.1329                                                                                                                            |

|    |                                            |                                                             |                                                      |                                                                                                                                                                                                                                 |
|----|--------------------------------------------|-------------------------------------------------------------|------------------------------------------------------|---------------------------------------------------------------------------------------------------------------------------------------------------------------------------------------------------------------------------------|
|    |                                            |                                                             |                                                      | MF vs. FM: P=0.0230                                                                                                                                                                                                             |
| 4e | Graft CD3 <sup>+</sup> cell density        | MM (n=9); MX (n=8); MF (n=10); FF (n=7); FX (n=8); FM (n=9) | Two-way ANOVA with Sidak's multiple comparisons test | Interaction: F (2, 45) = 0.5943, P=0.5562<br>Graft type: F (2, 45) = 0.1624, P=0.8506<br>Host sex: F (1, 45) = 0.0005950, P=0.9806<br><br>No significant differences between groups                                             |
| 4f | Graft CD8 <sup>+</sup> cell density        | MM (n=8); MX (n=7); MF (n=9); FF (n=7); FX (n=6); FM (n=8)  | Two-way ANOVA with Sidak's multiple comparisons test | Interaction: F (2, 39) = 5.904, P=0.0058<br>Graft type: F (2, 39) = 7.905, P=0.0013<br>Host sex: F (1, 39) = 17.65, P=0.0001<br><br>MM vs. FM: P=0.0001;<br>MX vs. FM: P<0.0001;<br>MF vs. FM: P<0.0001;<br>FF vs. FM: P=0.0002 |
| 4g | Perivascular CD3 <sup>+</sup> cell density | MM (n=9); MX (n=4); MF (n=9); FF (n=5); FX (n=6); FM (n=9)  | Two-way ANOVA with Sidak's multiple comparisons test | Interaction: F (2, 36) = 4.542, P=0.0174<br>Graft type: F (2, 36) = 1.011, P=0.3739<br>Host sex: F (1, 36) = 5.727, P=0.0220<br><br>MM vs. FM: P=0.0016;<br>MF vs. FM: P=0.0199                                                 |
| 4h | Perivascular CD8 <sup>+</sup> cell density | MM (n=9); MX (n=4); MF (n=9); FF (n=6); FX (n=6); FM (n=9)  | Two-way ANOVA with Sidak's multiple comparisons test | Interaction: F (2, 37) = 4.515, P=0.0176<br>Graft type: F (2, 37) = 7.269, P=0.0022<br>Host sex: F (1, 37) = 6.230, P=0.0171<br><br>MM vs. FM: P=0.0031;<br>MF vs. FM: P=0.0006;<br>FF vs. FM: P=0.0011;<br>MX vs. FM: P=0.0127 |
| 4i | % Cytotoxic T cells                        | MM (n=8); MX (n=7); MF (n=9); FF (n=7); FX (n=6); FM (n=8)  | Two-way ANOVA with Sidak's multiple comparisons test | Interaction: F (2, 38) = 3.127, P=0.0553<br>Graft type: F (2, 38) = 6.155, P=0.0048<br>Host sex: F (1, 38) = 13.88, P=0.0006                                                                                                    |



|     |                                |                          |                             |                                                                                             |
|-----|--------------------------------|--------------------------|-----------------------------|---------------------------------------------------------------------------------------------|
|     |                                |                          |                             | MM vs. FM: P=0.0268;<br>MX vs. FM: P=0.0030;<br>MF vs. FM: P=0.0016;<br>FF vs. FM: P=0.0056 |
| S4  | Graft GFP intensity            | FF (n=6); FM (n=8)       | Unpaired t test, two-tailed | t=1.268, df=12<br>P=0.2287                                                                  |
| S5a | CD68 <sup>+</sup> cell density | Female (n=6); Male (n=6) | Unpaired t test, two-tailed | t=2.105, df=10<br>P=0.0615                                                                  |
| S5b | Iba1 staining intensity        | Female (n=6); Male (n=6) | Unpaired t test, two-tailed | t=0.6622, df=10<br>P=0.5228                                                                 |
| S5c | GFAP staining intensity        | Female (n=6); Male (n=6) | Unpaired t test, two-tailed | t=1.227, df=10<br>P=0.2479                                                                  |
| S5d | CD3 <sup>+</sup> cell density  | Female (n=6); Male (n=6) | Unpaired t test, two-tailed | t=0.4964, df=10<br>P=0.6303                                                                 |
| S5e | CD8 <sup>+</sup> cell density  | Female (n=6); Male (n=6) | Unpaired t test, two-tailed | t=0.9409, df=10<br>P=0.3689                                                                 |

**Supplementary Table 2. Primary and secondary antibodies used in this study.**

| Antibody                                                 | Catalog #                           | RRID        | Dilution<br>(working<br>concentration) |
|----------------------------------------------------------|-------------------------------------|-------------|----------------------------------------|
| Primary antibodies                                       |                                     |             |                                        |
| Rat anti-CD3, clone 17A2                                 | BioLegend #100202                   | AB_312659   | 1:100 (5 µg/mL)                        |
| Hamster anti-CD31, clone 2H8                             | Millipore #MAB1398Z                 | AB_94207    | 1:500 (1 µg/mL)                        |
| Rat anti-CD8a, clone 53-6.7                              | BioLegend #100702                   | AB_312741   | 1:500 (1 µg/mL)                        |
| Rat anti-CD68, clone FA-11                               | BioLegend #137002                   | AB_2044004  | 1:100 (5 µg/mL)                        |
| Chicken anti-GFAP                                        | Encor Bio #CPCA-GFAP                | AB_2109953  | 1:2000 (5 µg/mL)                       |
| Rabbit anti-GFP                                          | Thermo Fisher #A-6455               | AB_221570   | 1:1500 (5 µg/mL)                       |
| Rabbit anti-Iba1                                         | Wako #019-19741                     | AB_839504   | 1:1000 (5 µg/mL)                       |
| Guinea pig anti-NeuN                                     | Millipore #ABN90                    | AB_11205592 | 1:3000 (5 µg/mL)                       |
| Secondary antibodies                                     |                                     |             |                                        |
| AlexaFluor 488-AffiniPure Donkey anti-rabbit IgG         | Jackson ImmunoResearch #711-545-152 | AB_2313584  | 1:1000 (1 µg/mL)                       |
| AlexaFluor 647-AffiniPure Donkey anti-rabbit IgG         | Jackson ImmunoResearch #711-605-152 | AB_2492288  | 1:1000 (1 µg/mL)                       |
| AlexaFluor 647-AffiniPure Donkey anti-chicken IgY        | Jackson ImmunoResearch #703-605-155 | AB_2340379  | 1:1000 (1 µg/mL)                       |
| AlexaFluor 488-AffiniPure Donkey anti-guinea pig IgG     | Jackson ImmunoResearch #706-545-148 | AB_2340472  | 1:1000 (1 µg/mL)                       |
| AlexaFluor 594-AffiniPure Donkey anti-guinea pig IgG     | Jackson ImmunoResearch #706-585-148 | AB_2340474  | 1:1000 (1 µg/mL)                       |
| AlexaFluor 594-AffiniPure Goat anti-rat IgG              | Jackson ImmunoResearch #112-585-062 | AB_2338377  | 1:1000 (1 µg/mL)                       |
| AlexaFluor 647-AffiniPure Goat anti-rat IgG              | Jackson ImmunoResearch #112-605-062 | AB_2338398  | 1:1000 (1 µg/mL)                       |
| AlexaFluor 647-AffiniPure Goat anti-Armenian hamster IgG | Jackson ImmunoResearch #127-605-160 | AB_2339001  | 1:1000 (1 µg/mL)                       |
